# Supplementary material for: Comparative Anatomical and Transcriptomics Reveal the Larger Cell Size as a Major Contributor to Larger Fruit Size in Apricot
Source: MDPI journal article supplement (doi:10.3390/ijms24108748), 2023-05-14
Supplement: s1 [file s1]

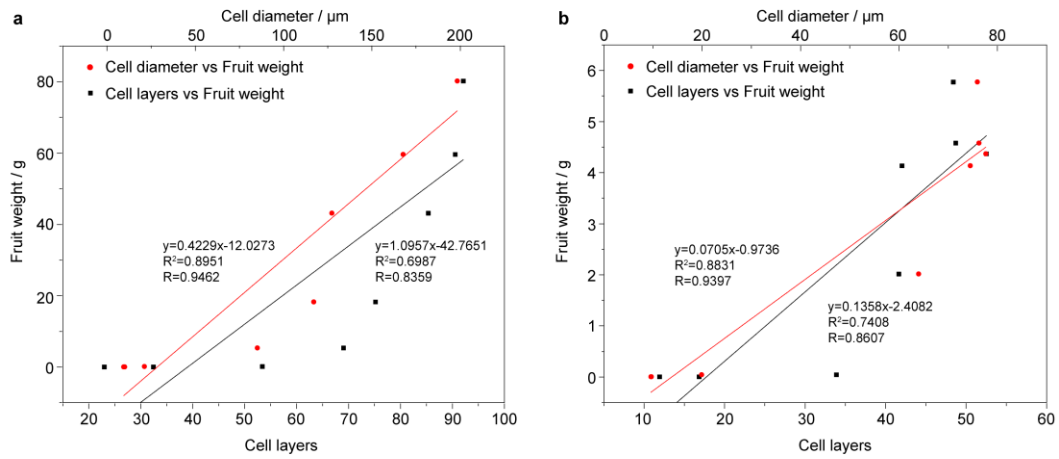

**Figure S1. Relationships among fruit weight and fruit cell characteristics in the two apricots during development. a.** Cell diameter is more strongly positively correlated with fruit weight in ‘Sungold’ than cell layers. **b.** Cell diameter is more strongly positively correlated with fruit weight in ‘F43’ than cell layers.

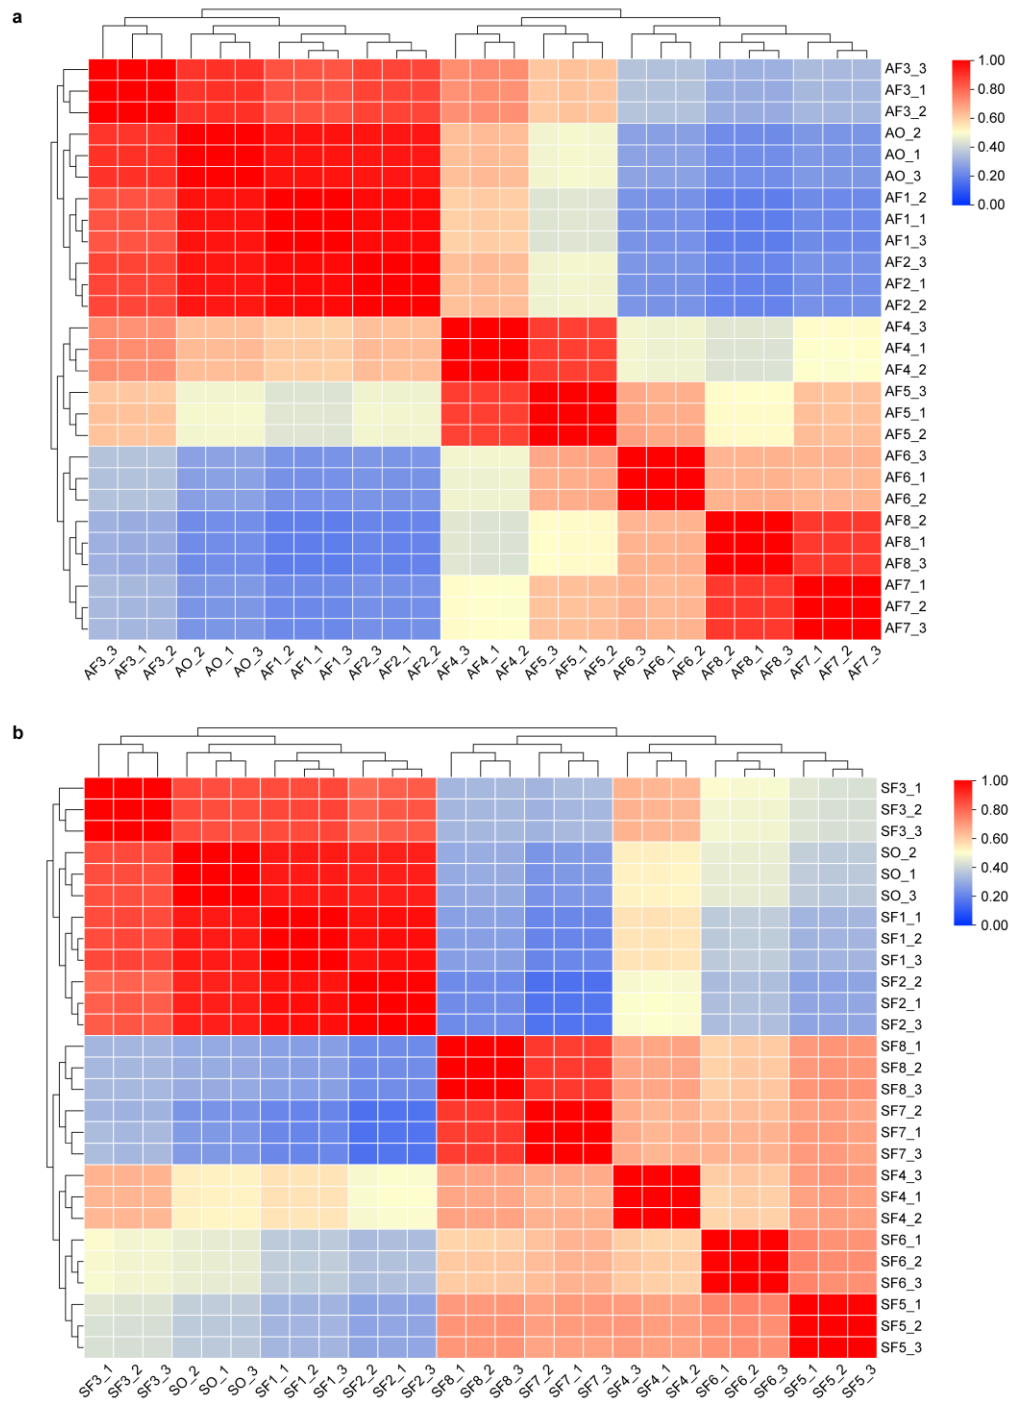

**Figure S2. Heat maps showing the correlation between transcriptomes of three biological replicates of each tissue sample from 'Sungold' and 'F43'. a.** Pearson correlation coefficient (PCC) among the three biological replicates of nine developmental stages in 'Sungold' (AO, AF1-AF8) is shown. **b.** PCC among the three biological replicates of nine developmental stages in 'F43' (SO, SF1-SF8) is shown. 1-3, three biological replicates of each sample.

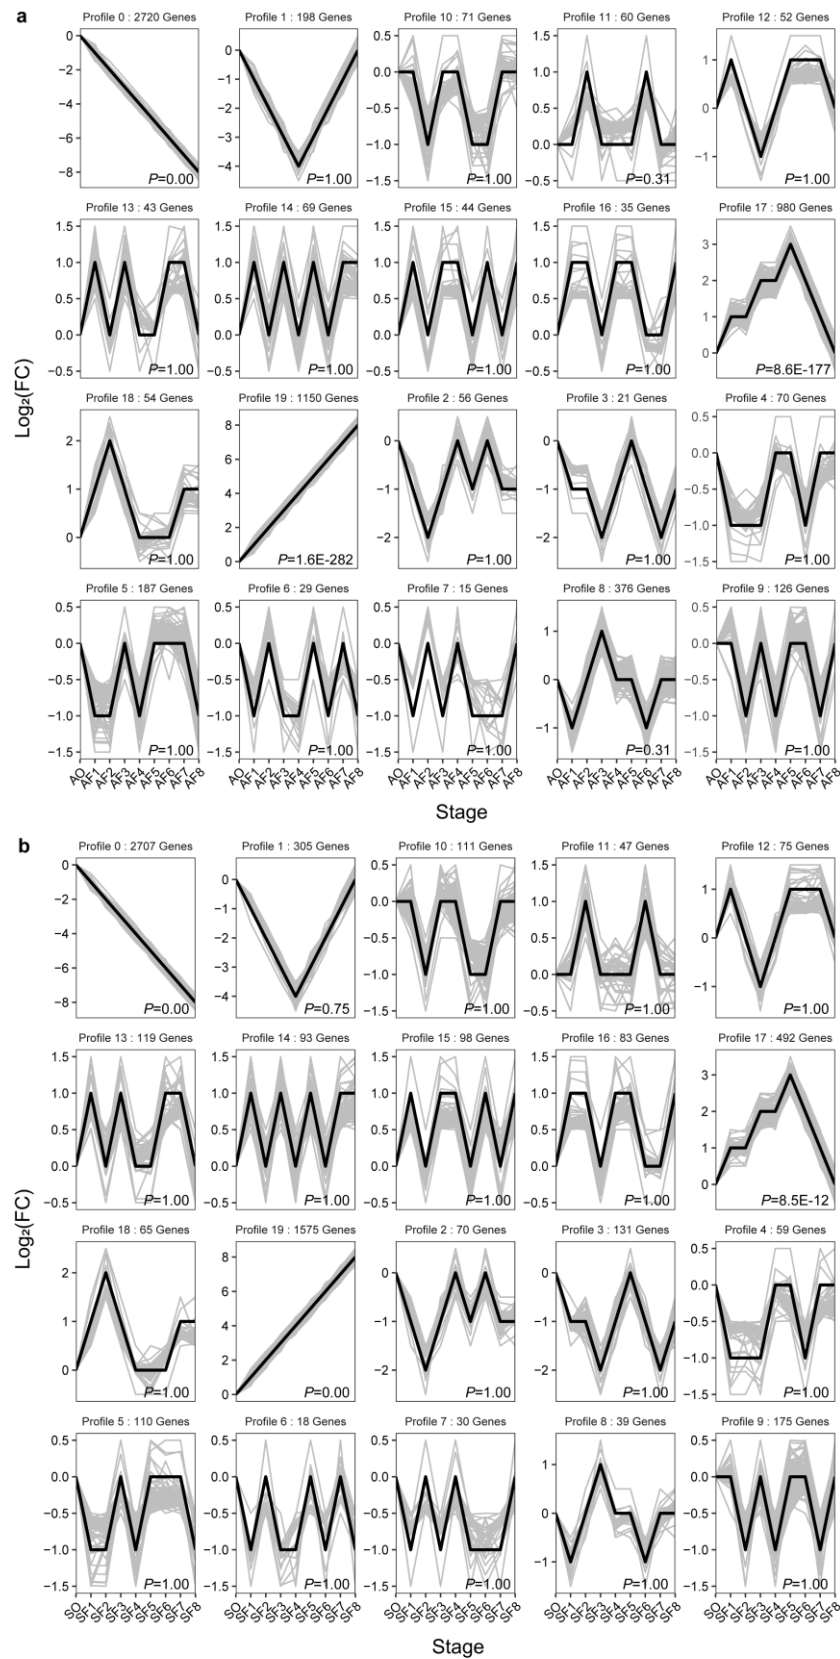

**Figure S3. The clustering profiles of the expression trends of all DEGs using STEM analysis.** The x-axis represents nine representative development stages and the y-axis shows the logFold-change (FC). **a.** 'Sungold'. **b.** 'F43'.

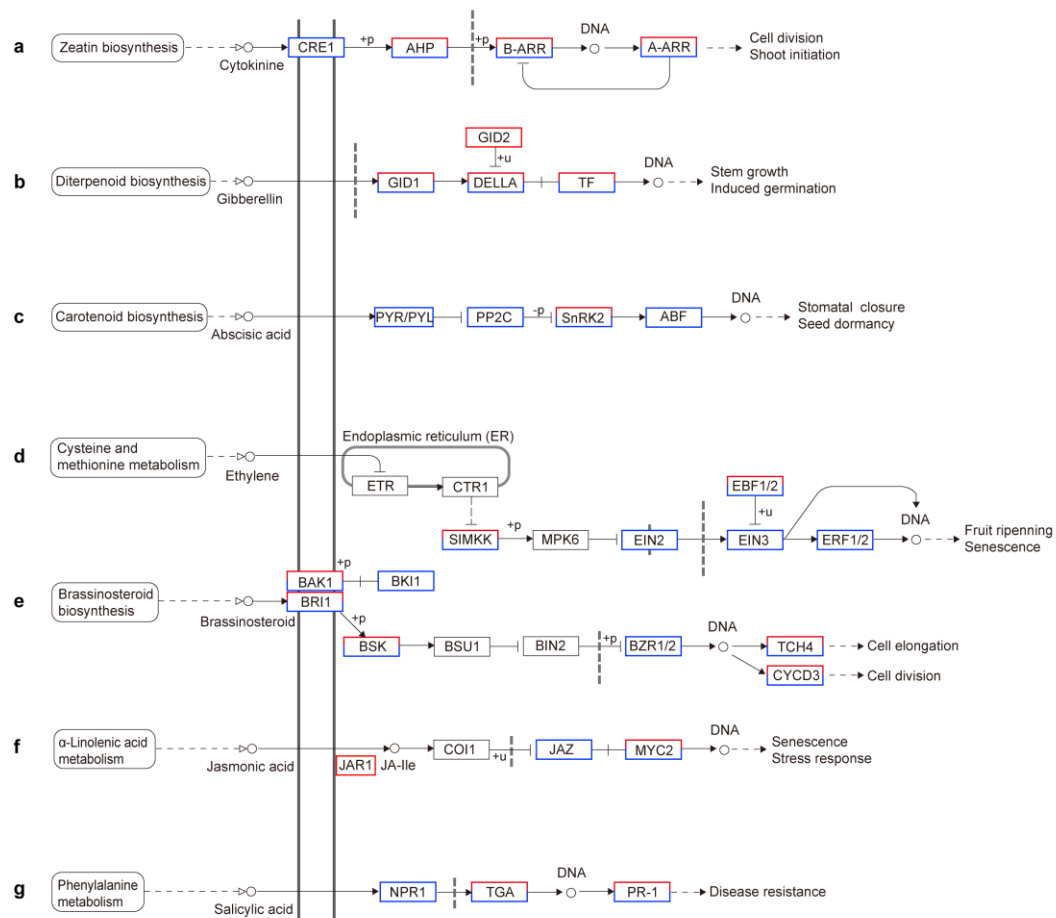

**Figure S4. Schematic diagram of DEGs enriched in plant hormone signal transduction pathway in all nine comparisons between ‘Sungold’ and ‘F43’.** Key enzymes with DEGs enrichment have colored rectangles. The red indicates the DEGs dominated by upregulation, and the blue indicates DEGs dominated by downregulation. **a.** Cytokine signaling pathway. **b.** Gibberellin signaling pathway. **c.** Absciscic acid signaling pathway. **d.** Ethylene signaling pathway. **e.** Brassinosteroid signaling pathway. **f.** Jasmonic acid signaling pathway. **g.** Salicylic acid signaling pathway.

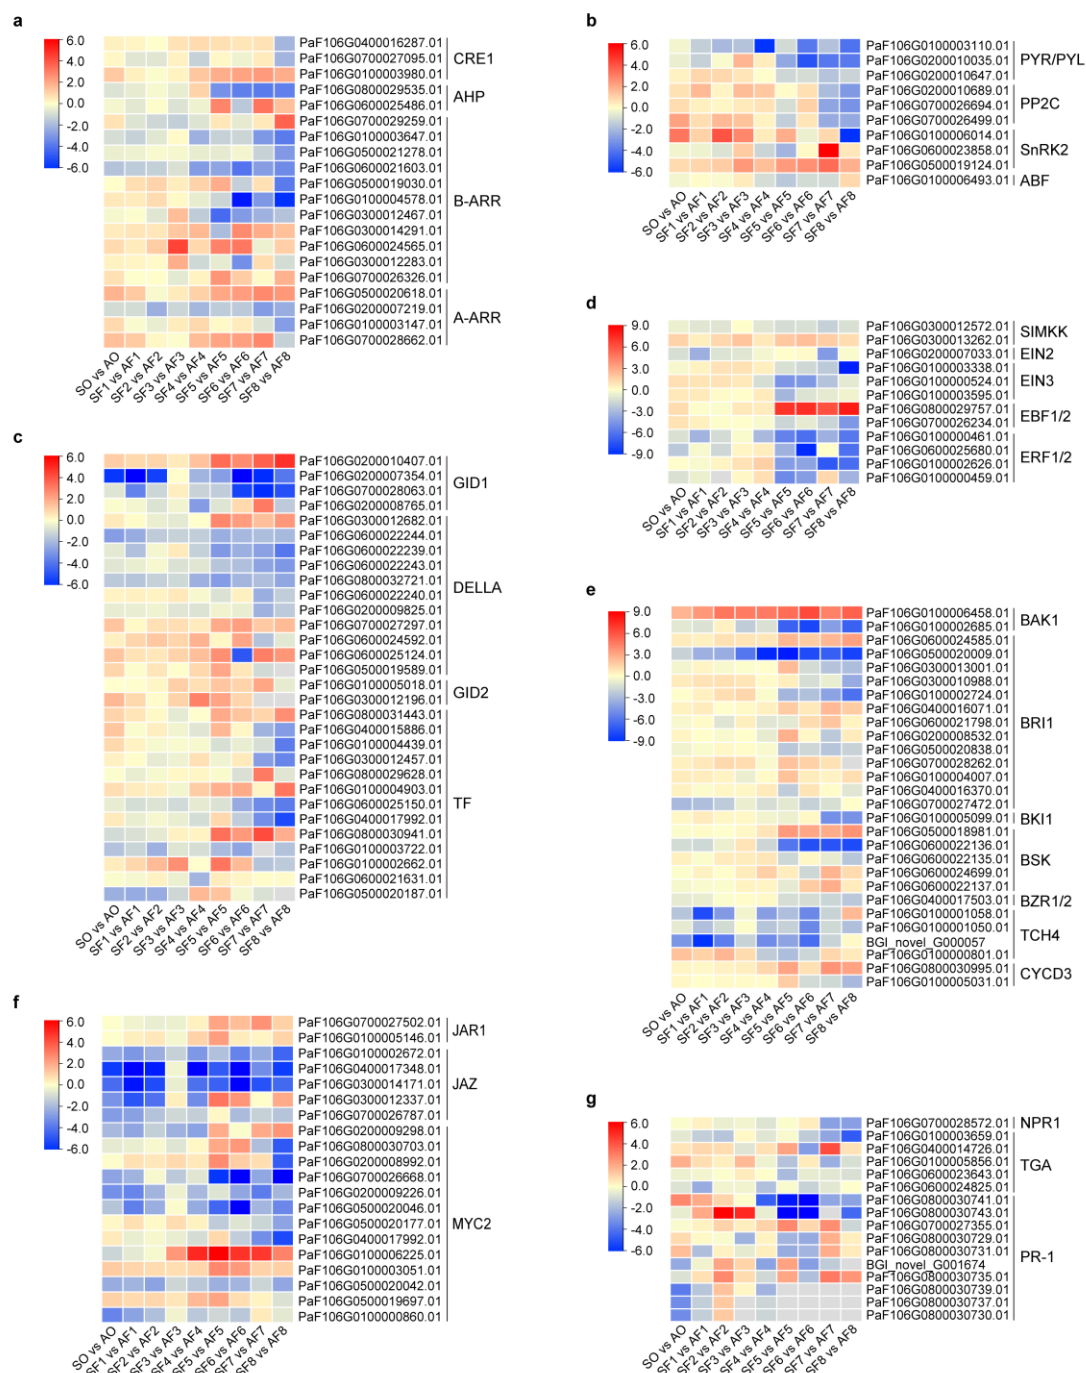

**Figure S5. Heat maps showing the differences in expressions of DEGs link to key enzymes involved in plant hormone signal transduction.** The redder color represents the higher  $\log_2FC$ , and the bluer color represents the lower  $\log_2FC$ . The yellow color represents the median value, and the gray color represents not available (NA). **a.** Cytokinin. CRE1, arabidopsis histidine kinase; AHP, histidine-containing phosphotransfer protein; B-ARR, two-component response regulator ARR-B family; A-ARR, two-component response regulator ARR-A family; **b.** Absciscic acid. PYR/PYL, abscisic acid receptor PYR/PYL family;

PP2C, protein phosphatase 2C; SnRK2, serine/threonine-protein kinase SRK2; ABF, ABA responsive element binding factor; **c.** Gibberellin. GID1, gibberellin receptor GID1; DELLA, DELLA protein; GID2, F-box protein GID2; TF, phytochrome-interacting factor 4; **d.** Ethylene. SIMKK, mitogen-activated protein kinase kinase; EIN2, ethylene-insensitive protein 2; EIN3, ethylene-insensitive protein 3; EBF1/2, EIN3-binding F-box protein; ERF1/2, ethylene-responsive transcription factor; **e.** Brassinosteroid. BAK1, brassinosteroid insensitive 1-associated receptor kinase 1; BRI1, protein brassinosteroid insensitive 1; BKI1, BRI1 kinase inhibitor 1; BSK, BR-signaling kinase; BZR1/2, brassinosteroid resistant 1/2; TCH4, xyloglucan: xyloglucosyl transferase TCH4; CYCD3, cyclin D3; **f.** Jasmonic acid. JAR1, jasmonic acid-amino synthetase; JAZ, jasmonate ZIM domain-containing protein; MYC2, transcription factor MYC2; **g.** Salicylic acid. NPR1, regulatory protein NPR1; TGA, transcription factor TGA; PR-1, pathogenesis-related protein 1.

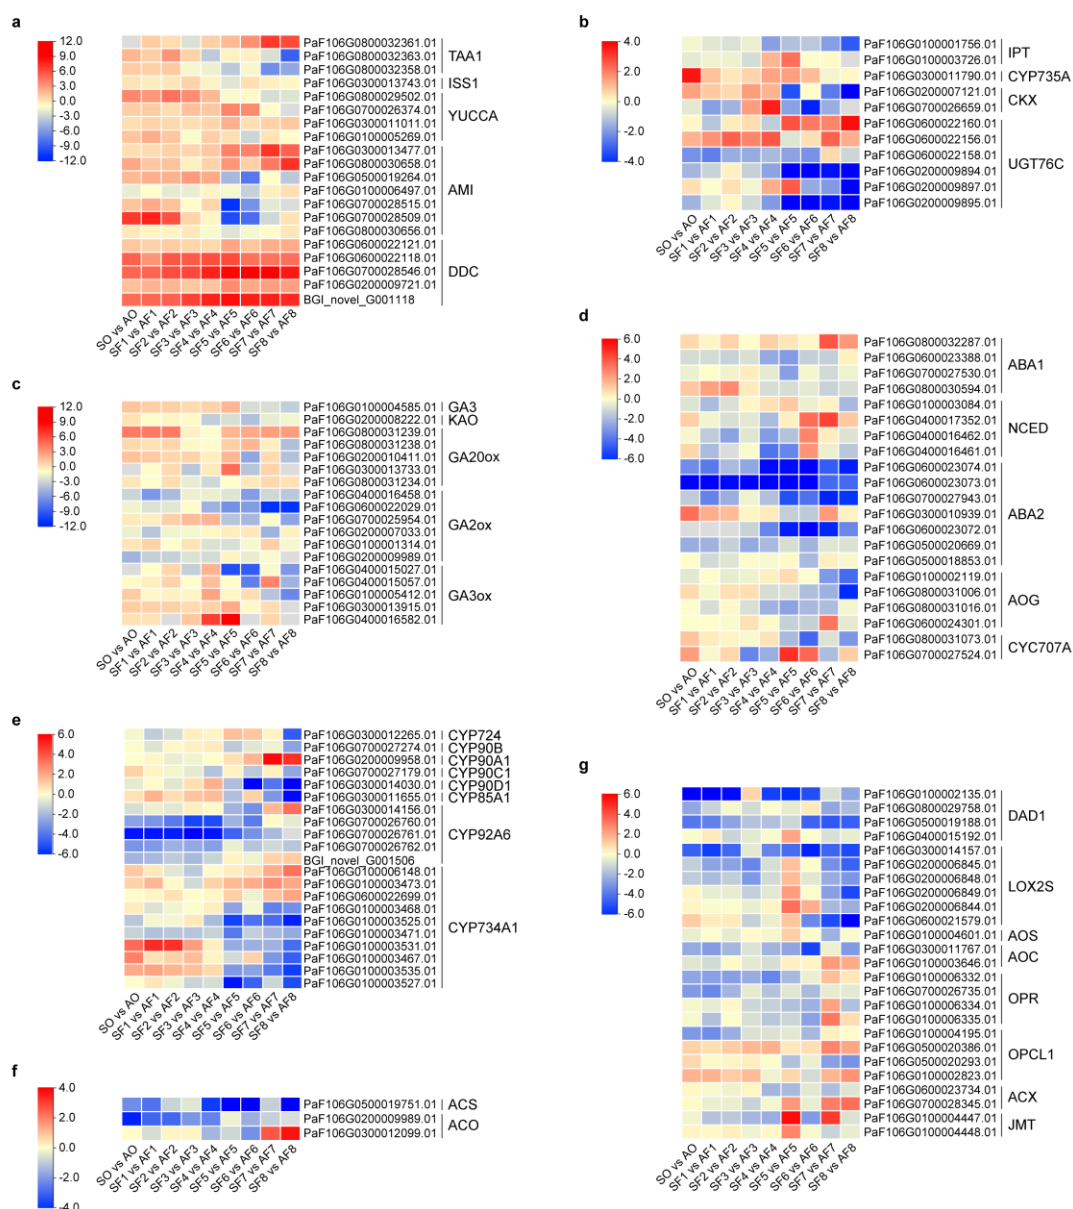

**Figure S6. Heat maps showing the differences in expressions of the DEGs link to key enzymes involved in plant hormone biosynthesis and metabolism.** The redder color represents the higher log<sub>2</sub>FC, and the bluer color represents the lower log<sub>2</sub>FC. The yellow color represents the median value, and the gray color represents NA. **a.** Auxin. TAA1, L-tryptophan-pyruvate aminotransferase; ISS1, aromatic aminotransferase; YUCCA, indole-3-pyruvate monooxygenase; AMI, amidase; DDC, aromatic-L-amino-acid/L-tryptophan decarboxylase; **b.** Cytokinins. IPT, adenylate dimethylallyltransferase; CYP735A, cytokinin trans-hydroxylase; CKX, cytokinin dehydrogenase; UGT76C, cytokinin-N-glucosyltransferase; **c.** Gibberellins. GA3, ent-kaurene oxidase; KAO, ent-kaurenoic acid monooxygenase; GA20ox, gibberellin-44 dioxygenase; GA2ox, gibberellin 2beta-dioxygenase; GA3ox, gibberellin 3beta-dioxygenase; **d.** Absciscic acid. ABA1, zeaxanthin epoxidase; NCED, 9-cis-epoxycarotenoid dioxygenase; ABA2, xanthoxin dehydrogenase; AOG, abscisate beta-glucosyltransferase; CYP707A, (+)-abscisic acid 8'-hydroxylase; **e.** Brassinosteroid. CYP724/CYP90B, steroid 22S-hydroxylase; CYP90A1, 3beta,22alpha-

dihydroxysteroid 3-dehydrogenase; CYP90C1/CYP90D1, 3-epi-6-deoxocathasterone 23-monooxygenase; CYP85A1, brassinosteroid 6-oxygenase; CYP92A6, typhasterol/6-deoxytyphasterol 2 $\alpha$ -hydroxylase; CYP734A1, PHYB activation tagged suppressor 1; **f.** Ethylene. ACS, 1-aminocyclopropane-1-carboxylate synthase; ACO, aminocyclopropanecarboxylate oxidase; **g.** Jasmonic acid. DAD1, phospholipase A1; LOX2S, lipoxygenase; AOS, hydroperoxide dehydratase; AOC, allene oxide cyclase; OPR, 12-oxophytodienoic acid reductase; OPCL1, OPC-8:0 CoA ligase 1; ACX, acyl-CoA oxidase; JMT, jasmonate O-methyltransferase.

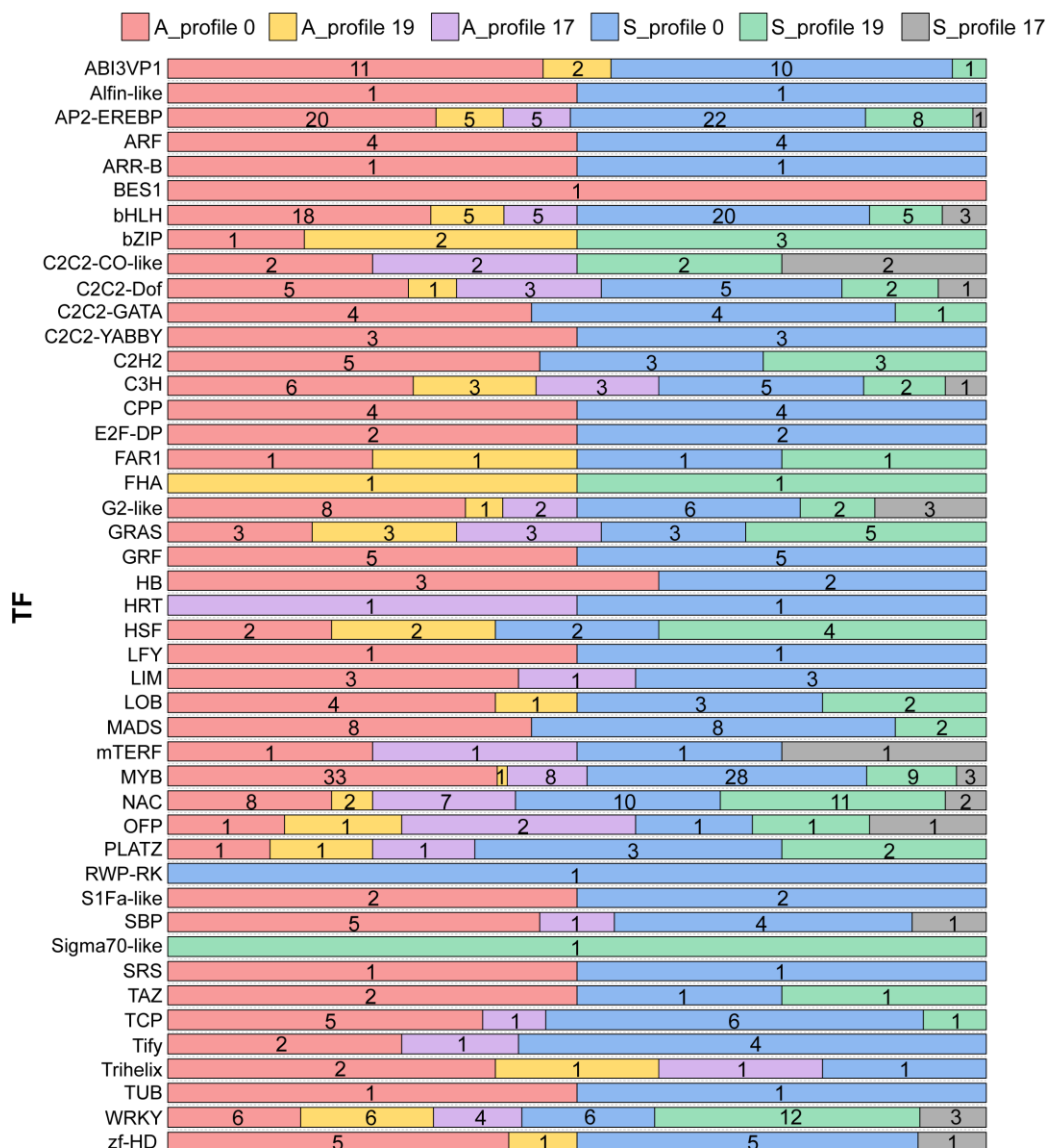

**Figure S7. Distribution of differentially expressed TF families in six predominant clustering gene profiles from ‘Sungold’ and ‘F43’.** A represents ‘Sungold’ and S represents ‘F43’.



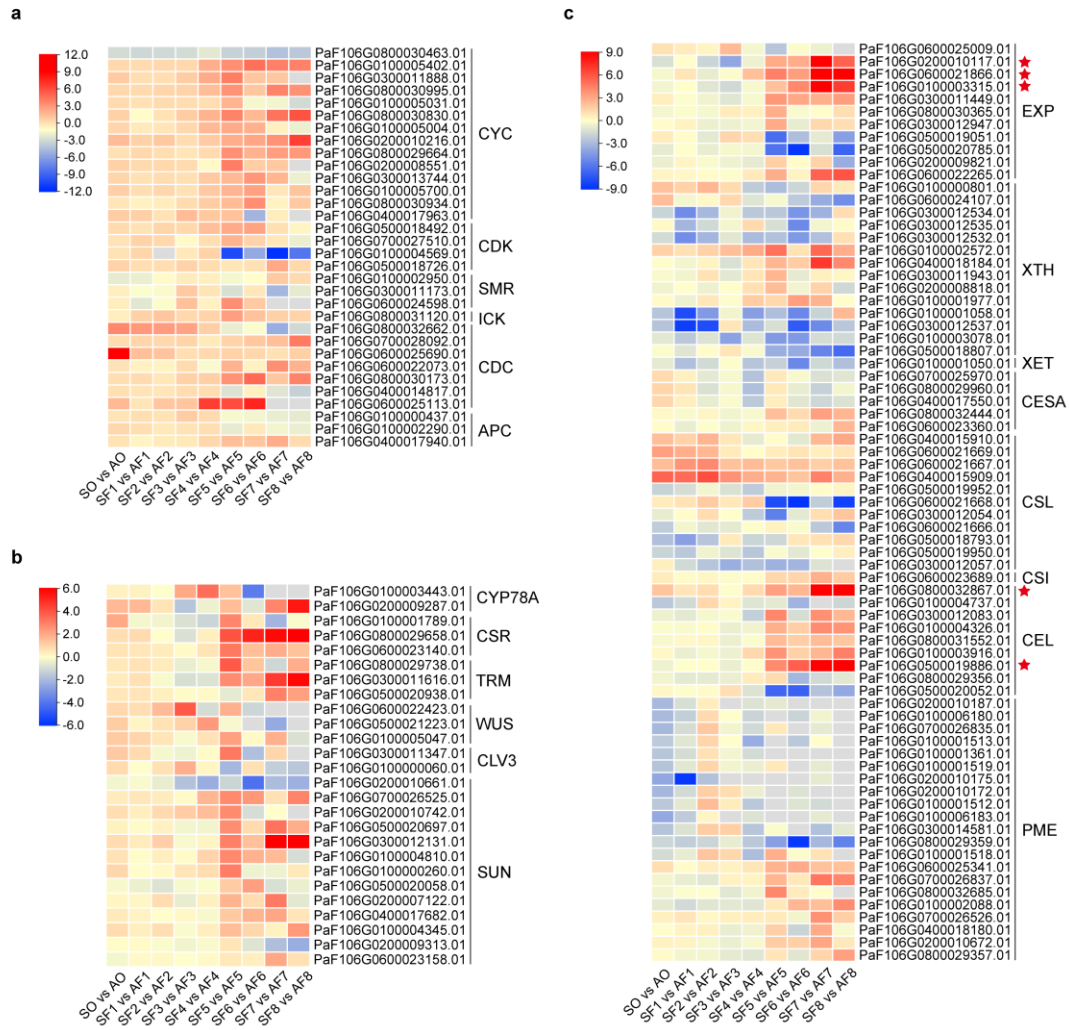

**Figure S8. Heat maps showing the differences in expressions of underlying genes related to cell division and cell expansion.** The redder color represents the higher log<sub>2</sub>FC, and the bluer color represents the lower log<sub>2</sub>FC. The yellow color represents the median value, and the gray color represents NA. **a.** The genes related to cell cycle control. **b.** The genes homologous to major known QTLs for fruit size-related traits. **c.** The genes related to cell wall loosening. The red stars indicate the genes with the most significant differences in gene expressions from the clustering branch of Figure 4d.

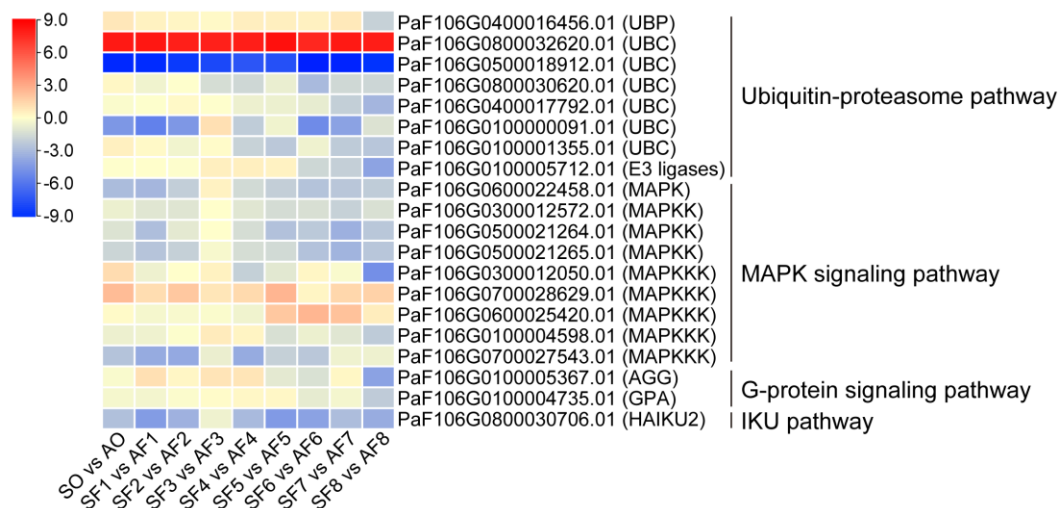

**Figure S9. Heat map showing the differences in expressions of DEGs involved in signaling pathways.** The redder color represents the higher  $\log_2FC$ , and the bluer color represents the lower  $\log_2FC$ . The yellow color represents the median value, and the gray color represents NA.

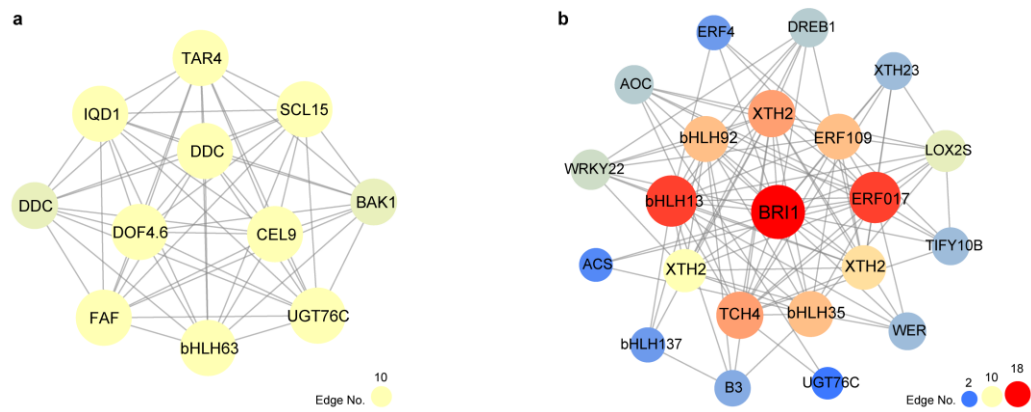

**Figure S10. The co-expression networks of the MEgreenyellow module and the MEblack module.** **a.** The co-expression network contained 11 co-expression genes in the MEgreenyellow module, and there were only 54 connected edges between these 11 genes. **b.** The co-expression network contained 22 co-expression genes in the MEblack module.

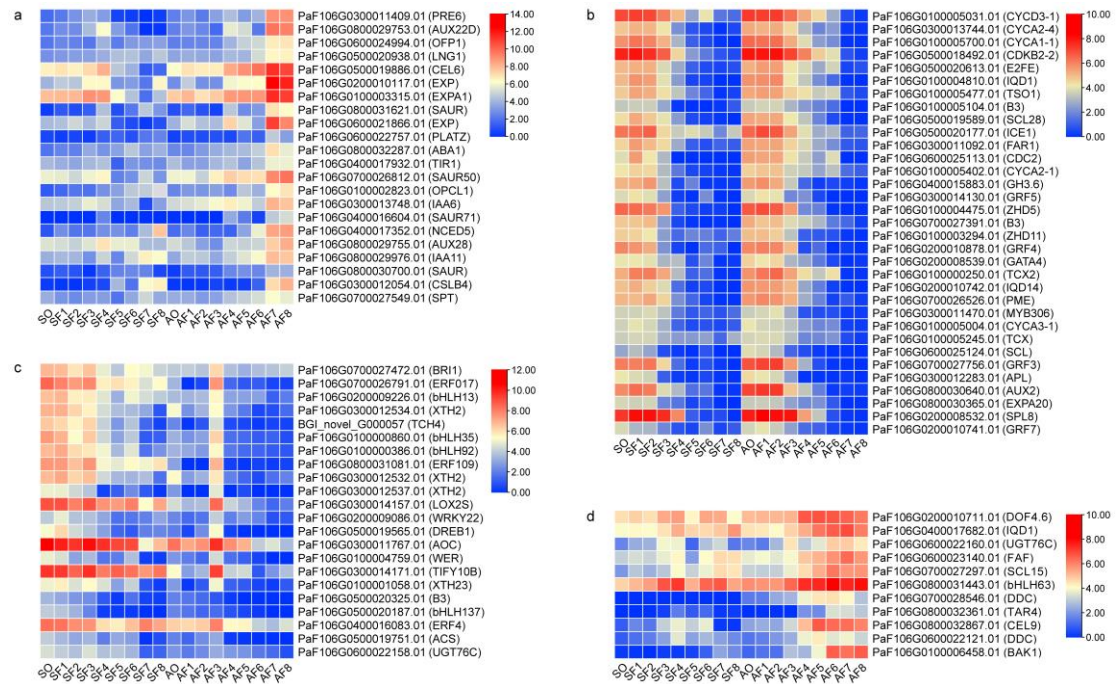

**Figure S11. Heat maps showing the expressions of DEGs in the four gene co-expression networks.** The expression levels of DEGs in all 18 samples from ‘Sungold’ and ‘F43’ were shown as  $\log_2(\text{FPKM}+1)$  values. The redder color represents the higher  $\log_2(\text{FPKM}+1)$ , and the bluer color represents the lower  $\log_2(\text{FPKM}+1)$ . The yellow color represents the median value. **a.** MEgreen module; **b.** METurquoise module; **c.** MEblack module ; **d:** MEgreenyellow module.

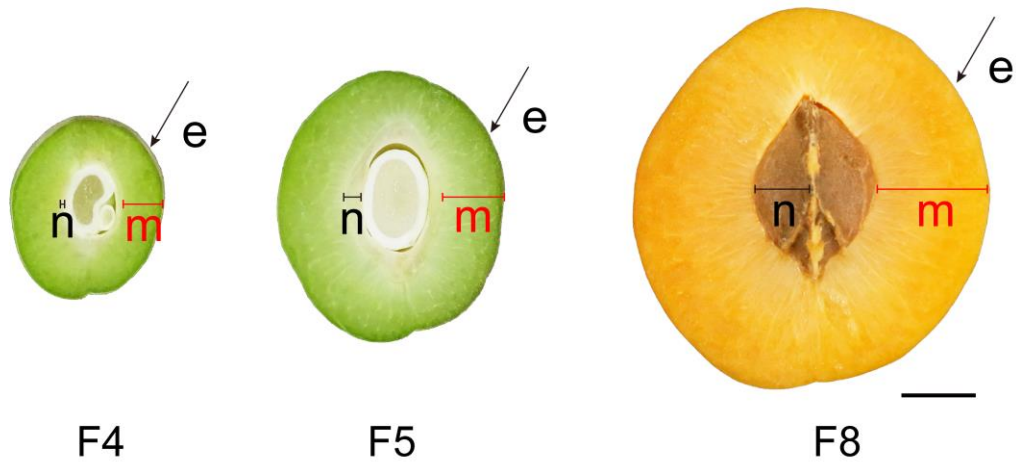

**Figure S12. The diagram of the cross-section of the equatorial position of 'Sungold' fruit at stages F4, F5, and F8.** The black arrows indicate the epicarp (e). The red line segments indicate the mesocarp (m) and the black line segments indicate the endocarp (n). bar = 1.0 cm. At stage F4, the endocarp is soft and can be cut directly; at stage F5, the endocarp is in the initial lignification process; at stage F8, the endocarp has been completely lignified.
